# Supplementary material
Source: Springer Nature journal article supplement (https://www.springermedizin.de/resource/supplementary/12967_2011_972_MOESM6_ESM.pdf/9573172)

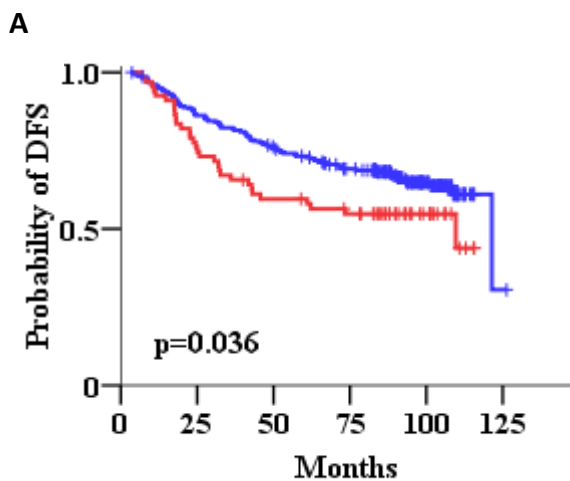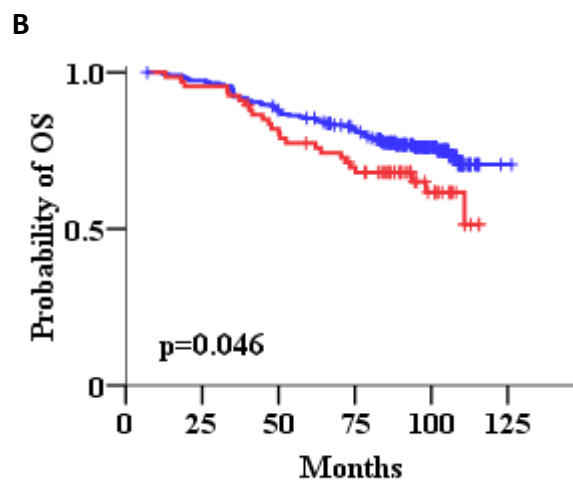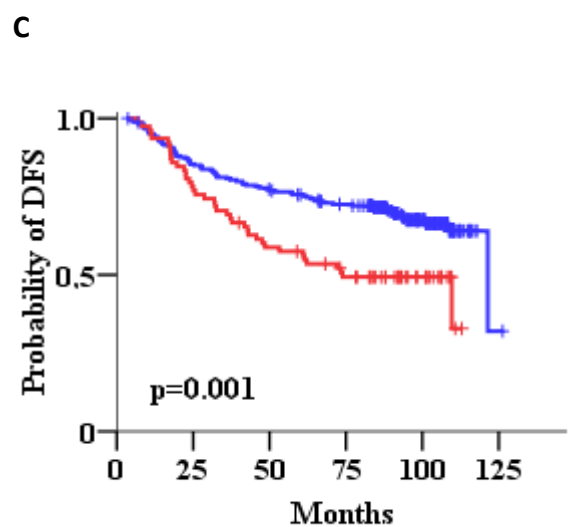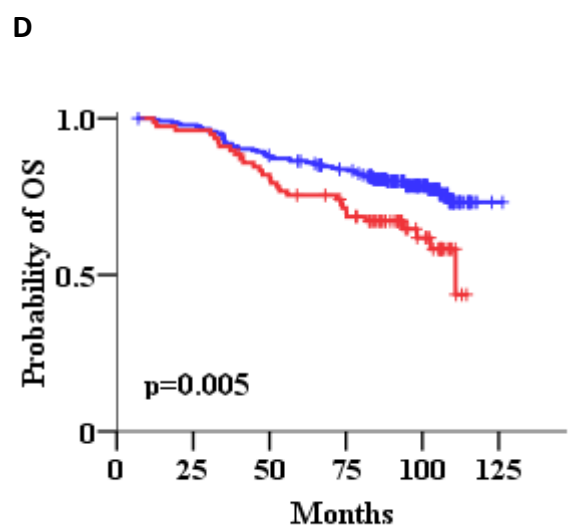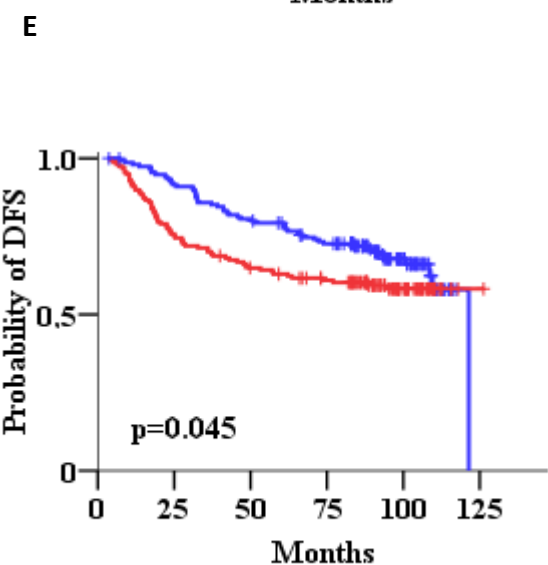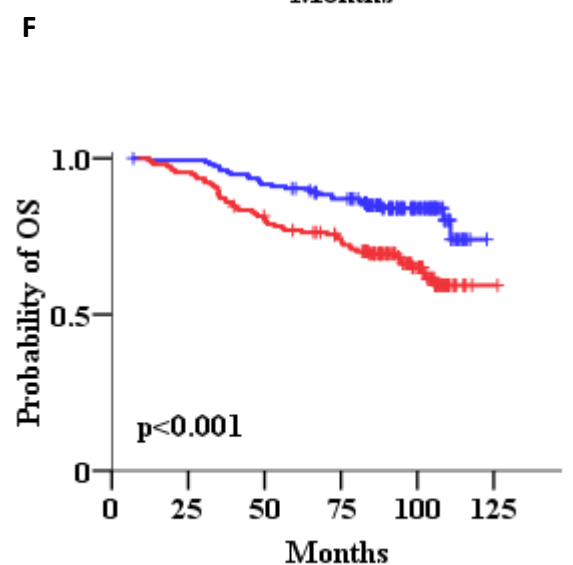

Supplement: MOESM6 [file 9573172]
